# Supplementary material for: Design of a highly sensitive fluorescent sensor and its application based on inhibiting NaIO4 oxidizing rhodamine 6G
Source: Royal Society of Chemistry journal article supplement (doi:10.1039/c4ay00853g), 2014-01-01
Supplement: c4ay00853g1.pdf [file c4ay00853g1.pdf]

## Electronic Supplementary Information

### Design of highly sensitive fluorescence sensor and its application based on inhibiting $\text{NaIO}_4$ oxidizing rhodamine 6G

Jia-Ming Liu, Qi-Tong Huang, Pei-Yuan Cai, Chang-Qing Lin, Li-Hong Zhang, Zhi-Yong Zheng

### Supporting Results

**Table S1.** Optimization of the concentration and volume of reagents

| Reagents                       | Concentrations<br>and volumes        | The $\Delta F$ in Rhod.6G-<br>$\text{aIO}_4^-$ buffer<br>solution- TBS system | Optimal   |
|--------------------------------|--------------------------------------|-------------------------------------------------------------------------------|-----------|
| Rhod.6G ( $\text{molL}^{-1}$ ) | $10^{-3}, 10^{-4}, 10^{-5}, 10^{-6}$ | 8.1, 36.6, 4.7, 2.2                                                           | $10^{-4}$ |
| (mL)                           | 0.50, 1.00, 1.50, 2.00, 2.50         | 9.6, 22.7, 38.9, 21.8, 12.3                                                   | 1.50mL    |
| $\text{NaIO}_4$ (%) (mL)       | 0.05, 0.10, 0.50, 1.00, 3.00         | 10.0, 18.2, 36.2, 8.5, 4.1                                                    | 0.50 %    |
|                                | 0.50, 1.00, 1.50, 2.00, 2.50         | 12.2, 25.1, 38.7, 18.4, 10.0                                                  | 1.50mL    |
| Buffer solution (mL)           | 0.50, 1.00, 1.50, 2.00, 2.50, 3.00   | 0.6, 1.4, 19.5, 38.2, 11.7, 3.5                                               | 2.00 mL   |

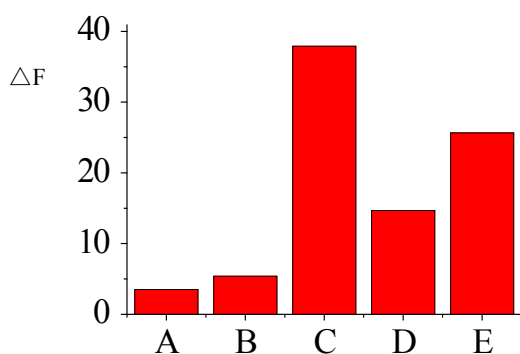

**Fig. S1** Effects of luminescence substrates  
on  $\Delta F$  for the system  
(A, B and C are FITC, Rhod.6G  
A and R, respectively.)

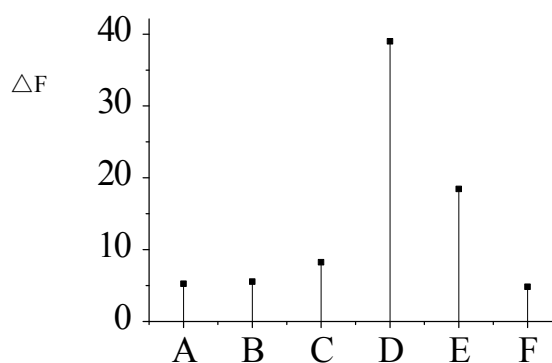

**Fig. S2** Effects of oxidants on  $\Delta F$   
for the system  
(A, B, C, D, E and F are  $\text{H}_2\text{O}_2$ ,  $\text{KIO}_4$ ,  
 $\text{K}_2\text{S}_2\text{O}_8$ ,  $\text{KClO}_3$  and  $\text{KBrO}_3$ , respectively.)

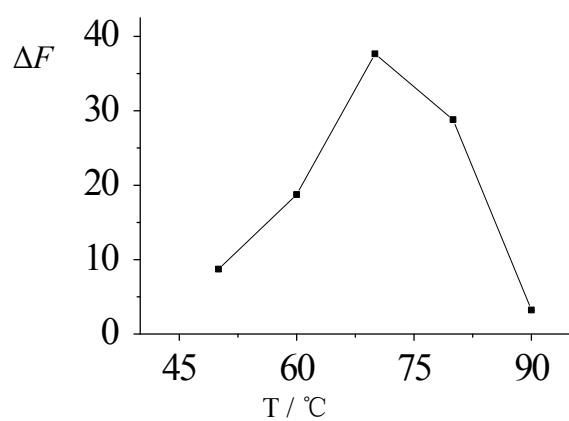

Fig. S3 Effects of reaction temperature on  $\Delta F$  for the system

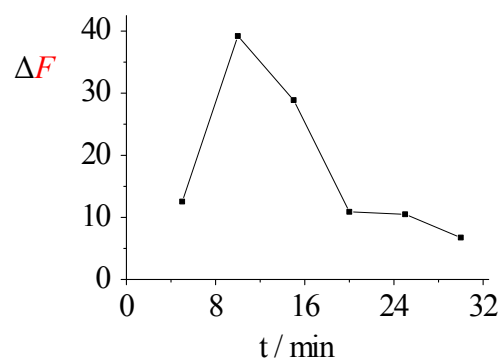

Fig. S4 Effect of reaction time on  $\Delta F$  for system

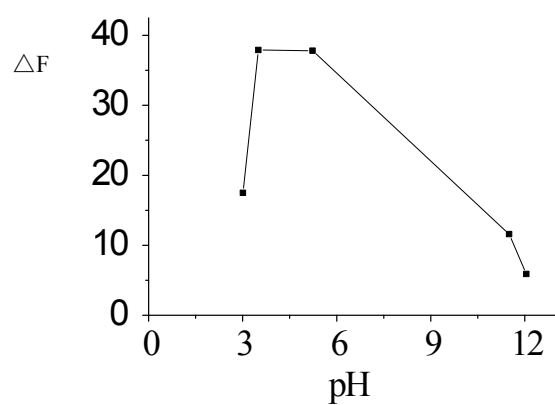

Fig. S5 Effect of reaction acidity on  $\Delta F$  for system

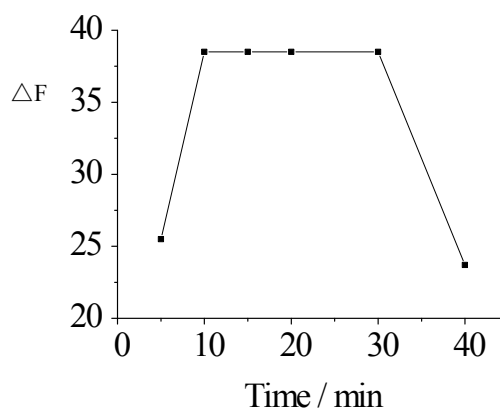

Fig. S6 Effect of standing time on  $\Delta F$  for system
